# Supplementary material for: Co/rGO synthesized via the alcohol-thermal method as a heterogeneous catalyst for the highly efficient oxidation of ethylbenzene with oxygen
Source: Royal Society of Chemistry journal article supplement (doi:10.1039/c9nj00470j), 2019-01-01
Supplement: c9nj00470j1.pdf [file c9nj00470j1.pdf]

## *Supporting Information*

# **Co/rGO Synthesized via Alcohol Thermal Methods as Heterogeneous Catalyst for Highly Efficient Oxidation of Ethylbenzene with Oxygen**

**Lingfeng Gao,<sup>\*,[a]</sup> WenYun Zhuge, Xue Feng,<sup>[a]</sup> Wei Sun,<sup>[a]</sup> Xu Sun, <sup>\*, [a]</sup> Gengxiu Zheng <sup>[a]</sup>**

<sup>a</sup> School of Chemistry and Chemical Engineering, University of Jinan, Jinan, Shandong 250022, China.

*E-mail* address: gaolf108@mail.ustc.edu.cn

chm\_sunx@ujn.edu.cn

**General Remarks:** Benzyl alcohol, acetonitrile and acetophenone were purchased from Tianjin Fuyu Fine Chemical Co. Ltd. (Tianjin, China). N-Hydroxyphthalimide (NHPI) and  $\text{Co}(\text{OAc})_2 \cdot 4\text{H}_2\text{O}$  were purchased from Sigma Chemical Co. (St. Louis, MO, USA), and the natural graphite powder was obtained from Sinopharm chemical reagent Co. Ltd. (China). All other reagents were of analytical grade and ultrapure water was used throughout the study.

### **Contents:**

**General remarks**

**Table S1 Compositions of the Co/rGO catalyst**

**Fig. S1 XRD pattern of Co/rGO composite after five runs used**

**Fig. S2 SEM (a-c) and EDS (d) images of Co/rGO after five runs use**

**Fig.S3. HRTEM image of  $\text{Co}_3\text{O}_4$  nanoparticles on GO nanosheet**

**Figure S4. Element mapping of Co/GO catalyst**

**Figure S5. XPS spectral of Co/GO catalyst after 5 cycles.**

**Fig. S6  $^1\text{H}$ NMR of the product acetophenone**

**Fig. S7 GC-MS spectrogram of the reaction solution**

**Table S1** Compositions of the Co/rGO catalyst.

| Sample | Atomic % <sup>a</sup> |      |      | Weight % <sup>a</sup> | Weight % <sup>b</sup> |
|--------|-----------------------|------|------|-----------------------|-----------------------|
|        | C                     | O    | Co   | Co                    | Co                    |
| Co/rGO | 55.9                  | 32.5 | 11.6 | 36.5                  | 35.8                  |

<sup>a</sup>The surface elemental composition of the catalyst determined by XPS. <sup>b</sup>The total cobalt loading analysed by ICP-OES.

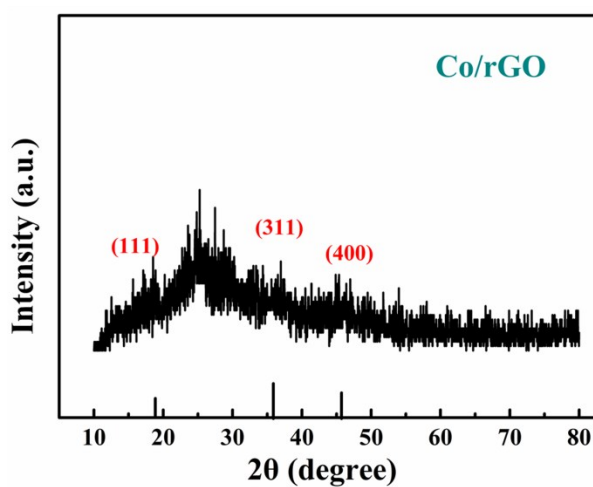

**Fig. S1.** XRD pattern of Co/rGO composite after five runs used.

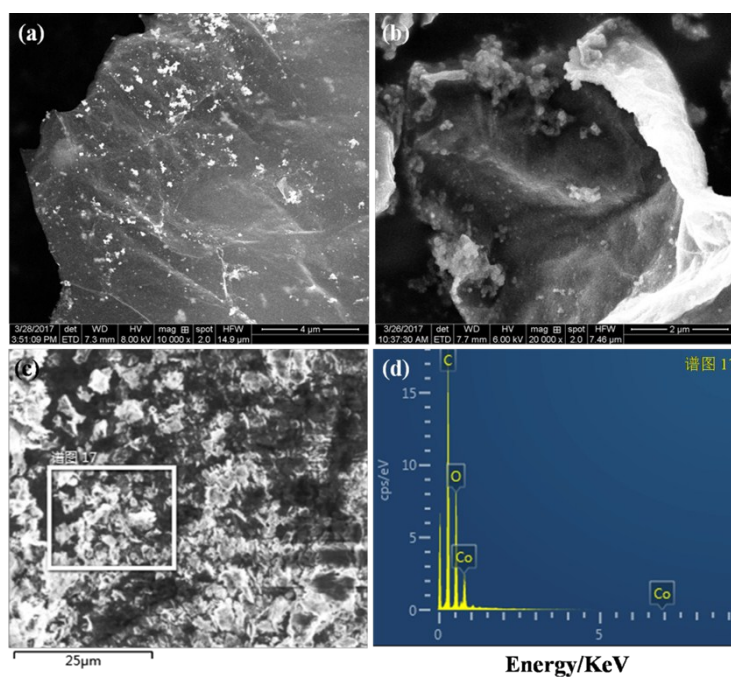

**Fig. S2.** SEM (a-c) and EDS (d) images of Co/rGO after five runs used.

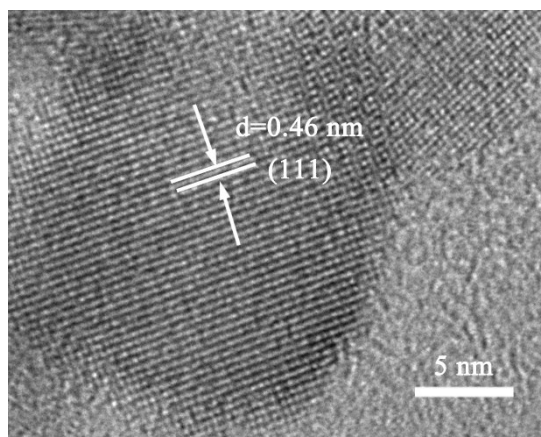

**Fig.S3.** HRTEM image of Co<sub>3</sub>O<sub>4</sub> nanoparticles on GO nanosheet.

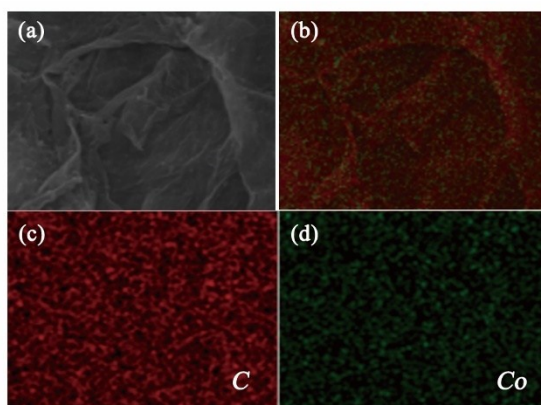

**Figure S4.** Element mapping of Co/GO catalyst

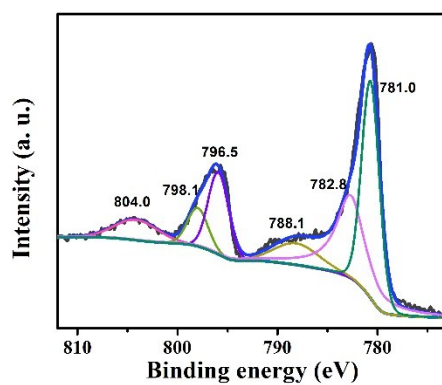

**Figure S5.** XPS spectral of Co/GO catalyst after 5 cycles.

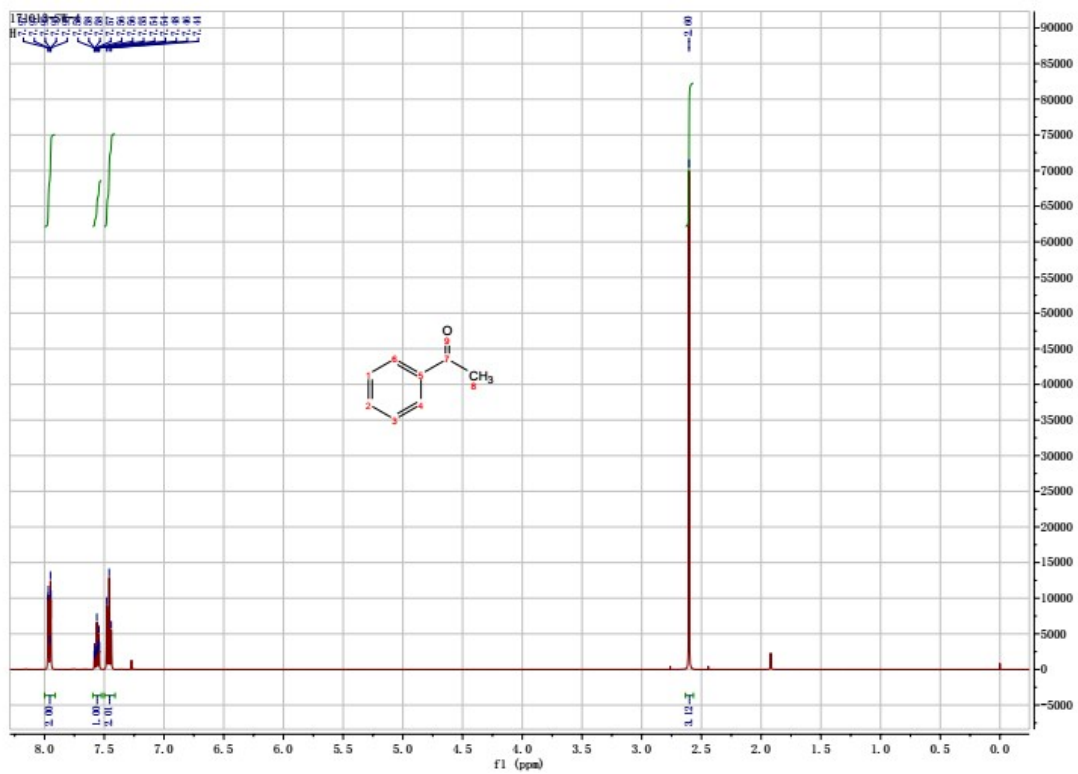

**Fig. S6. <sup>1</sup>H NMR of the product acetophenone.**

# GCMS Analysis Report

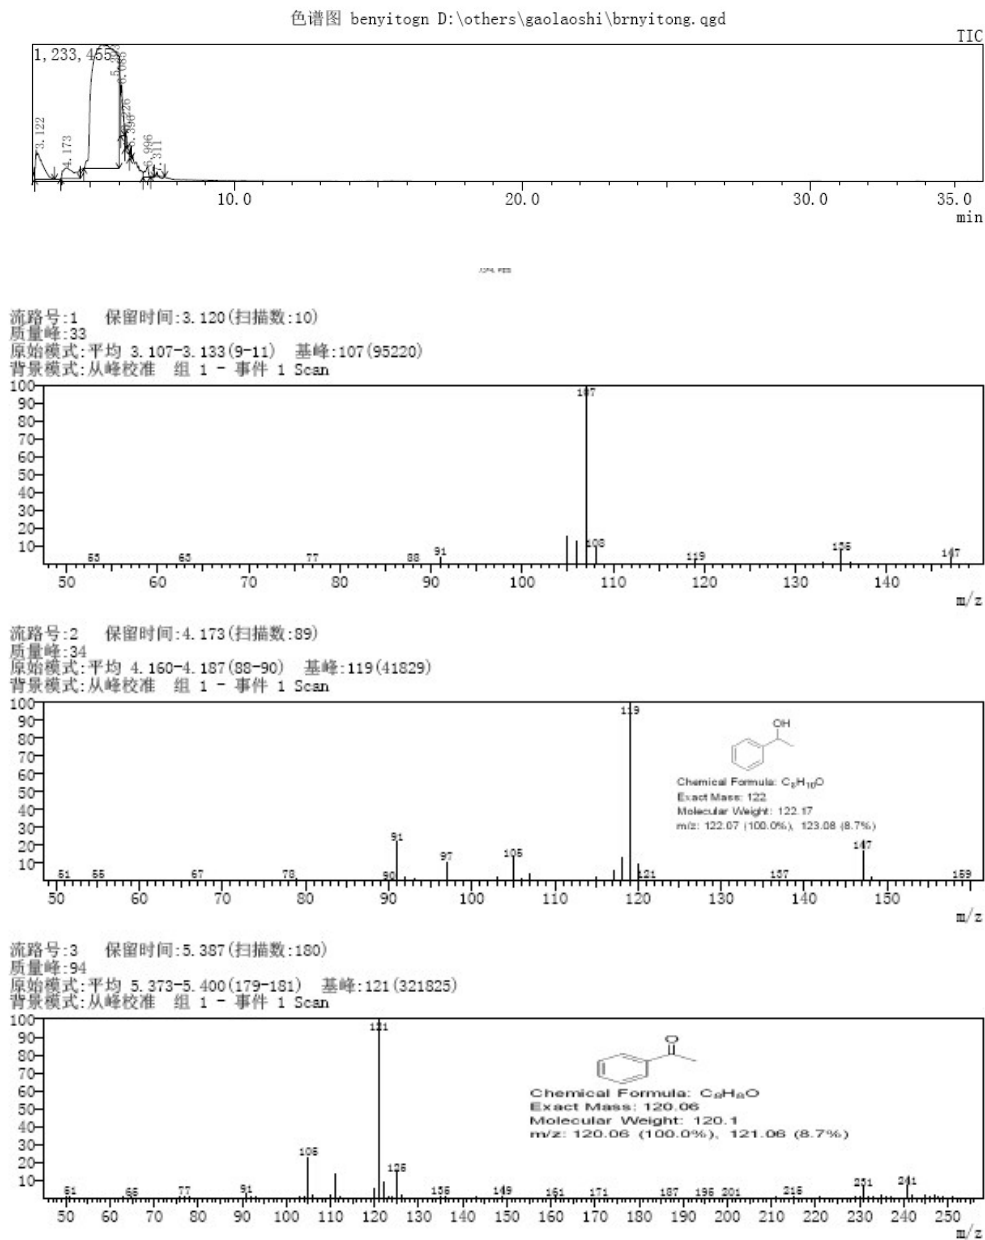

Fig. S7. GC-MS spectrogram of the reaction solution.
